# Supplementary material for: GC-MS Fingerprinting Combined with Chemical Pattern-Recognition Analysis Reveals Novel Chemical Markers of the Medicinal Seahorse
Source: MDPI journal article supplement (doi:10.3390/molecules28237824), 2023-11-28
Supplement: s1 [file s1]

**Table S1.** Peak areas of main components for 9 different incubation times.

| No | Retention Time | Component                                               | Peak Area |          |          |          |          |           |          |          |           |
|----|----------------|---------------------------------------------------------|-----------|----------|----------|----------|----------|-----------|----------|----------|-----------|
|    |                |                                                         | 0.5min    | 1min     | 2min     | 5min     | 10min    | 20min     | 30min    | 60min    | 120       |
| 1  | 6.320          | methyl laurate                                          | 645350    | 529586   | 686910   | 818932   | 964060   | 1254681   | 1482307  | 1707511  | 2654681   |
| 2  | 8.363          | methyl tetradecanoate                                   | 9690699   | 9256389  | 10352933 | 9549470  | 9178340  | 19956017  | 12648033 | 13739551 | 18629667  |
| 3  | 9.519          | methyl pentadecanoate                                   | 1924134   | 2136321  | 2178214  | 2007276  | 2414418  | 4884670   | 2784450  | 2885592  | 3978540   |
| 4  | 10.843         | methyl hexadecanoate                                    | 42221388  | 40402057 | 45444019 | 42433709 | 42618131 | 94480667  | 63040908 | 71389843 | 108174575 |
|    | 22.516         | n-hexadecanoic acid                                     | 12440551  | 12020839 | 9900611  | 10670454 | 10069736 | 13770165  | 5908517  | 3692989  | 1655163   |
|    |                | methyl hexadecanoate + n-hexadecanoic acid              | 54661939  | 52422896 | 55344630 | 53104163 | 52687867 | 108250832 | 68949425 | 75082832 | 109829738 |
| 5  | 11.157         | methyl palmitoleate                                     | 9742728   | 9158303  | 9790751  | 9453857  | 9342234  | 19931855  | 12867240 | 14331684 | 19507887  |
| 6  | 11.864         | 2,4-Di-tert-butylphenol                                 | 2265346   | 1988241  | 2052772  | 2463125  | 2512893  | 4549372   | 3371435  | 3391209  | 6208333   |
| 7  | 12.302         | methyl margarate                                        | 3016549   | 2899912  | 3109540  | 2965587  | 2868861  | 6345431   | 3921760  | 4342845  | 6456922   |
| 8  | 13.975         | methyl stearate                                         | 13696241  | 13027893 | 14774804 | 14045673 | 14997866 | 31867130  | 23389564 | 26951090 | 46151009  |
|    | 26.635         | octadecanoic acid                                       | 7125829   | 5816322  | 4230809  | 5469759  | 5104558  | 7888532   | 4035119  | 2447003  | 1139269   |
|    |                | methyl stearate + octadecanoic acid                     | 20822070  | 18844215 | 19005613 | 19515432 | 20102424 | 39755662  | 27424683 | 29398093 | 47290278  |
| 9  | 14.266         | methyl trans-9-octadecenoate                            | 19422029  | 18604914 | 21215246 | 19355772 | 19082643 | 42108253  | 28329682 | 31344327 | 45836902  |
| 10 | 14.379         | methyl cis-9-octadecenoate                              | 3876600   | 3844893  | 4023735  | 3717733  | 3593349  | 8454141   | 5756896  | 6036562  | 9331756   |
|    | 27.151         | oleic acid                                              | 5251024   | 5363789  | 3435212  | 6725513  | 4765266  | 10758038  | 3778151  | 999895   | 0         |
|    |                | methyl cis-9-octadecenoate + oleic acid                 | 9127624   | 9208682  | 7458947  | 10443246 | 8358615  | 19212179  | 9535047  | 7036457  | 9331756   |
| 11 | 15.018         | methyl octadiene-9,12-dienecarboxylate                  | 4795514   | 4561522  | 4562288  | 4281324  | 4142321  | 8353240   | 6302196  | 6045676  | 8769512   |
| 12 | 16.388         | methyl 3-(3,5-Di-tert-butyl-4-hydroxyphenyl) propionate | 620812    | 581849   | 523381   | 884367   | 1522399  | 1613690   | 2526114  | 2612015  | 3254046   |
| 13 | 19.755         | methyl arachidonate                                     | 2791210   | 2814896  | 2966729  | 3192000  | 2893830  | 6921844   | 4591202  | 5330233  | 7386349   |
| 14 | 21.034         | methyl cis-5,8,11,14,17-eicosapentaenoate               | 5395139   | 5369979  | 5999213  | 5713119  | 5497889  | 11410231  | 8298579  | 8974083  | 12213698  |
| 15 | 25.748         | methyl 4,7,10,13,16,19-docosahexaenoate                 | 14518373  | 13270048 | 15490931 | 14794930 | 14362182 | 29685345  | 22329019 | 24380381 | 33277152  |

**Table S2.** Relative content (%) of main components for 9 different incubation times.

| No. | Retention Time | Component               |                                                         | Relative content (%) |       |       |       |       |       |       |       |        |            |
|-----|----------------|-------------------------|---------------------------------------------------------|----------------------|-------|-------|-------|-------|-------|-------|-------|--------|------------|
|     |                | Before methylation      | After methylation                                       | 0.5min               | 1min  | 2min  | 5min  | 10min | 20min | 30min | 60min | 120min | mean±S.D   |
| 1   | 6.320          | lauric acid             | methyl laurate                                          | 0.3                  | 0.27  | 0.33  | 0.4   | 0.48  | 0.29  | 0.53  | 0.57  | 0.6    | 0.42±0.13  |
| 2   | 8.363          | tetradecanoic acid      | methyl tetradecanoate                                   | 4.54                 | 4.68  | 4.91  | 4.68  | 4.6   | 4.66  | 4.55  | 4.59  | 4.18   | 4.60±0.19  |
| 3   | 9.519          | pentadecanoic acid      | methyl pentadecanoate                                   | 0.9                  | 1.08  | 1.03  | 0.98  | 1.21  | 1.14  | 1     | 0.96  | 0.89   | 1.02±0.11  |
| 4   | 10.843         | n-hexadecanoic acid     | methyl hexadecanoate                                    | 19.79                | 20.42 | 21.54 | 20.79 | 21.36 | 22.05 | 22.66 | 23.84 | 24.27  | 21.86±1.51 |
|     | 22.516         |                         | n-hexadecanoic acid                                     | 5.83                 | 6.08  | 4.69  | 5.23  | 5.05  | 3.21  | 2.12  | 1.23  | 0.37   | 3.76±2.10  |
|     | —              |                         | methyl hexadecanoate + n-hexadecanoic acid              | 25.62                | 26.5  | 26.23 | 26.02 | 26.41 | 25.26 | 24.78 | 25.07 | 24.64  | 25.61±0.71 |
| 5   | 11.157         | palmitoleic acid        | methyl palmitoleate                                     | 4.57                 | 4.63  | 4.64  | 4.63  | 4.68  | 4.65  | 4.63  | 4.79  | 4.38   | 4.62±0.11  |
| 6   | 11.864         | 2,4-di-tert-butylphenol | 2,4-Di-tert-butylphenol                                 | 1.06                 | 1.01  | 0.97  | 1.21  | 1.26  | 1.06  | 1.21  | 1.13  | 1.39   | 1.14±0.13  |
| 7   | 12.302         | margaric acid           | methyl margarate                                        | 1.41                 | 1.47  | 1.47  | 1.45  | 1.44  | 1.48  | 1.41  | 1.45  | 1.45   | 1.45±0.02  |
| 8   | 13.975         | octadecanoic acid       | methyl stearate                                         | 6.42                 | 6.59  | 7     | 6.88  | 7.52  | 7.44  | 8.41  | 9     | 10.35  | 7.73±1.29  |
|     | 26.635         |                         | octadecanoic acid                                       | 3.34                 | 2.94  | 2     | 2.68  | 2.56  | 1.84  | 1.45  | 0.82  | 0.26   | 1.99±1.01  |
|     | —              |                         | methyl stearate + octadecanoic acid                     | 9.76                 | 9.53  | 9     | 9.56  | 10.08 | 9.28  | 9.86  | 9.82  | 10.61  | 9.72±0.46  |
| 9   | 14.266         | elaidic acid            | methyl trans-9-octadecenoate                            | 9.1                  | 9.4   | 10.05 | 9.48  | 9.56  | 9.83  | 10.18 | 10.47 | 10.28  | 9.82±0.46  |
| 10  | 14.379         | oleic acid              | methyl cis-9-octadecenoate                              | 1.82                 | 1.94  | 1.91  | 1.82  | 1.8   | 1.97  | 2.07  | 2.02  | 2.09   | 1.94±0.11  |
|     | 27.151         |                         | oleic acid                                              | 2.46                 | 2.71  | 1.63  | 3.3   | 2.39  | 2.51  | 1.36  | 0.33  | 0      | 1.85±1.12  |
|     | —              |                         | methyl cis-9-octadecenoate + oleic acid                 | 4.28                 | 4.65  | 3.54  | 5.12  | 4.19  | 4.48  | 3.43  | 2.35  | 2.09   | 3.79±1.03  |
| 11  | 15.018         | linoleic acid           | methyl octadiene-9,12-dienecarboxylate                  | 2.25                 | 2.31  | 2.16  | 2.1   | 2.08  | 1.95  | 2.27  | 2.02  | 1.97   | 2.12±0.13  |
| 12  | 16.388         | fenozan acid            | methyl 3-(3,5-di-Tert-Butyl-4-hydroxyphenyl) propionate | 0.29                 | 0.29  | 0.25  | 0.43  | 0.76  | 0.38  | 0.91  | 0.87  | 0.73   | 0.55±0.27  |
| 13  | 19.755         | arachidonic acid        | methyl arachidonate                                     | 1.31                 | 1.42  | 1.41  | 1.56  | 1.45  | 1.62  | 1.65  | 1.78  | 1.66   | 1.54±0.15  |
| 14  | 21.034         | eicosapentaenoic acid   | methyl cis-5,8,11,14,17-eicosapentaenoate               | 2.53                 | 2.71  | 2.84  | 2.8   | 2.76  | 2.66  | 2.98  | 3     | 2.74   | 2.78±0.15  |
| 15  | 25.748         | docosahexaenoic acid    | methyl 4,7,10,13,16,19-docosahexaenoate                 | 6.81                 | 6.71  | 7.34  | 7.25  | 7.2   | 6.93  | 8.03  | 8.14  | 7.47   | 7.32±0.50  |

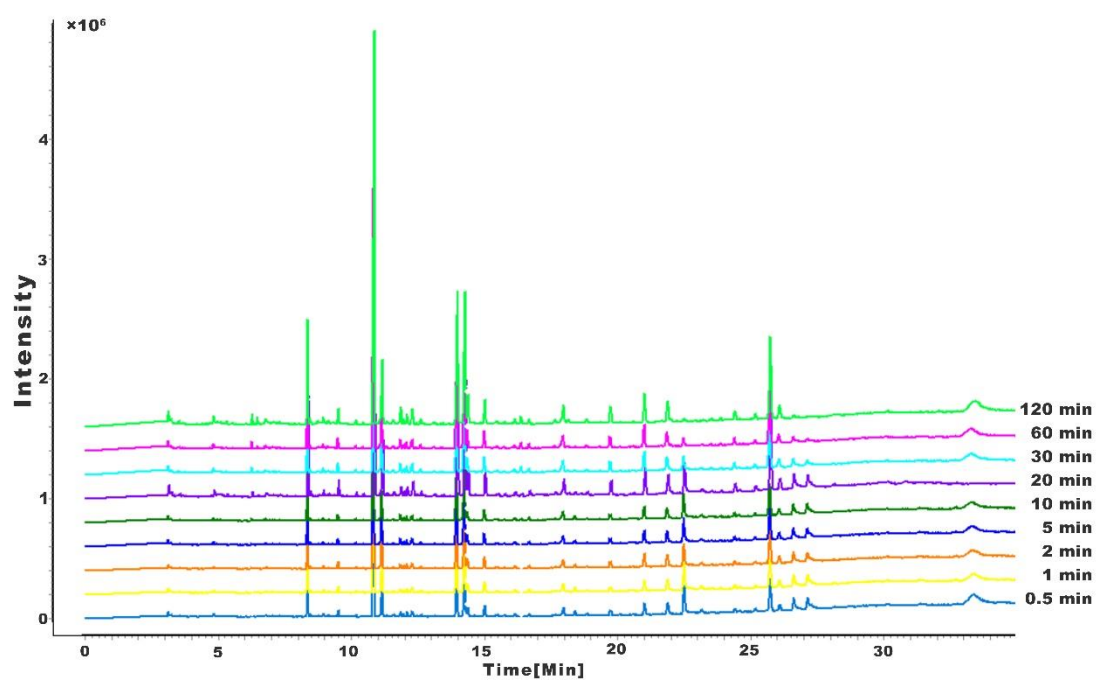

**Figure S1.** GC fingerprints of seahorse extract for 9 different incubation times.
